# Supplementary material for: CaV2.1 channel mutations causing familial hemiplegic migraine type 1 increase the susceptibility for cortical spreading depolarizations and seizures and worsen outcome after experimental traumatic brain injury
Source: eLife. 2022 Mar 3;11:e74923. doi: 10.7554/eLife.74923 (PMC8920504; doi:10.7554/eLife.74923)
Supplement: Figure 2—source data 1. [file elife-74923-fig2-data1.xlsx]

## Sheet: CSDs after trauma (Fig. 2B)
								Figure 2B
n	Animal	All CSDs observed after TBI within 90 min						All CSDs observed after TBI within 90 min w/o the first bi-lat.						Late bi-hemispheric CSDs observed within 90 min						Late contralateral CSDs observed within 90 min after TBI
		S218L WT	S218L het	S218L hom	R192Q WT	R192Q hom		S218L WT	S218L het	S218L hom	R192Q WT	R192Q hom		S218L WT	S218L het	S218L hom	R192Q WT	R192Q hom		S218L WT	S218L het	S218L hom	R192Q WT	R192Q hom
	1	1	4	16	1	3		0	3	15	0	2		0	3	4	0	1		0	1	5	0	0
	2	1	13	22	1	3		0	12	21	0	2		0	2	8	0	0		0	2	4	0	0
	3	1	10	8	1	3		0	9	7	0	2		1	3	3	0	0		0	3	0	0	0
	4	3	5	6	1	4		2	4	5	0	3		1	0	4	0	1		0	0	0	0	0
	5	1	4	24	2	4		0	3	23	1	3		0	0	8	0	0		0	0	0	0	0
	6	2	4	5	1	11		1	3	4	0	10		0	1	2	0	1		0	0	0	0	0
	7	2	3	5	0	0		1	2	4	0	0		0	0	1	0	0		0	0	0	0	0
	8	1	1		0	0		0	0		0	0		0	0		0	0		0	0		0	0
	9		2		0	0			1		0	0			0		0	0			0		0	0
	10		1		0	0			0		0	0			0		0	0			0		0	0
	Sum	12	47	86	7	28		4	37	79	1	22		2	9	30	0	3		0	6	9	0	0
	Mean	1.5	4.7	12.2857	0.7	2.8		0.5	3.7	11.2857	0.1	2.2		0.25	0.9	4.28571	0	0.3		0	0.6	1.28571	0	0
	Median	1	4	8	1	3		0	3	7	0	2		0	0	4	0	0		0	0	0	0	0
									7.4	15.8		4.4
n/animal/h		All CSDs observed after TBI normalized to 1 h						All CSDs observed after TBI normalized to 1 h w/o the first bi-lat.						Bi-hemispheric CSDs observed normalized to 1 h						Contralateral CSDs observed normalized to 1 h
		S218L WT	S218L het	S218L hom	R192Q WT	R192Q hom		S218L WT	S218L het	S218L hom	R192Q WT	R192Q hom		S218L WT	S218L het	S218L hom	R192Q WT	R192Q hom		S218L WT	S218L het	S218L hom	R192Q WT	R192Q hom
	1	0.666667	2.66667	10.6667	0.666667	2		0	2	10	0	1.33333		0	2	2.66667	0	0.666667		0	0.666667	3.33333	0	0
	2	0.666667	8.66667	14.6667	0.666667	2		0	8	14	0	1.33333		0	1.33333	5.33333	0	0		0	1.33333	2.66667	0	0
	3	0.666667	6.66667	5.33333	0.666667	2		0	6	4.66667	0	1.33333		0.666667	2	2	0	0		0	2	0	0	0
	4	2	3.33333	4	0.666667	2.66667		1.33333	2.66667	3.33333	0	2		0.666667	0	2.66667	0	0.666667		0	0	0	0	0
	5	0.666667	2.66667	16	1.33333	2.66667		0	2	15.3333	0.666667	2		0	0	5.33333	0	0		0	0	0	0	0
	6	1.33333	2.66667	3.33333	0.666667	7.33333		0.666667	2	2.66667	0	6.66667		0	0.666667	1.33333	0	0.666667		0	0	0	0	0
	7	1.33333	2	3.33333	0	0		0.666667	1.33333	2.66667	0	0		0	0	0.666667	0	0		0	0	0	0	0
	8	0.666667	0.666667		0	0		0	0		0	0		0	0		0	0		0	0		0	0
	9		1.33333		0	0			0.666667		0	0			0		0	0			0		0	0
	10		0.666667		0	0			0		0	0			0		0	0			0		0	0
	Sum	8	31.3333	57.3333	4.66667	18.6667		2.66667	24.6667	52.6667	0.666667	14.6667		1.33333	6	20	0	2		0	4	6	0	0
	Mean	1	3.13333	8.19048	0.466667	1.86667		0.333333	2.46667	7.52381	0.0666667	1.46667		0.166667	0.6	2.85714	0	0.2		0	0.4	0.857143	0	0
	Median	0.666667	2.66667	5.33333	0.666667	2		0	2	4.66667	0	1.33333		0	0	2.66667	0	0		0	0	0	0	0
