# Supplementary material for: CaV2.1 channel mutations causing familial hemiplegic migraine type 1 increase the susceptibility for cortical spreading depolarizations and seizures and worsen outcome after experimental traumatic brain injury
Source: eLife. 2022 Mar 3;11:e74923. doi: 10.7554/eLife.74923 (PMC8920504; doi:10.7554/eLife.74923)
Supplement: Figure 3—source data 1. [file elife-74923-fig3-data1.xlsx]

## Sheet: Seizures - Fig. 3
	Figure 3B						Figure 3C
	Animal	wt	het	hom			Animal	wt	het	hom
	1	0	4	4			1	0	8	83
	2	0	2	1			2	0	4	85
	3	0	1	2			3	0	0	31
	4	0	0	5			4	0	10	115
	5	0	2	6			5	0	0	133
	6	0	2	1			6	0	2	34
	7	1	3	3			7	0	0	72
	8	0	0	4			8	2	0	32
	9	0	2	8			9	0	4	24
	10	0	1	16			10	0	2	30
	11	0	4	4			11	0	0	242
	12	0	2	8
	13	0	0	1				11	11	11
	14	0	1	4
	15	0	0	3
	16	0	0	11
	17	0		5
	18	0
		18	16	17
							Überlebt	29	27	28
							Untersucht	29	28	49
							Gestorben	0	1	21
							%Gestorben	0	0.0357143	0.428571
