# Supplementary material for: CaV2.1 channel mutations causing familial hemiplegic migraine type 1 increase the susceptibility for cortical spreading depolarizations and seizures and worsen outcome after experimental traumatic brain injury
Source: eLife. 2022 Mar 3;11:e74923. doi: 10.7554/eLife.74923 (PMC8920504; doi:10.7554/eLife.74923)
Supplement: Figure 4—source data 1. [file elife-74923-fig4-data1.xlsx]

## Sheet: Brain edema - Fig. 4A, B
S218L		Figure 4A
	naive				sham wt			sham het			sham hom
Animal	wt	het	hom		left	right		left	right		left	right			CCI wt			CCI het			CCI hom
1	77.0152	77.9709	75.4856		79.1675	77.4874		78.4367	79.4118		77.3036	77.6114		Animal	left	right		left	right		left	right
2	76.0202	76.7193	76.673		78.0898	77.3573		77.6439	78.6264		76.9101	77.641		1	78.6948	78.2268		78.4181	79.9783		79.7365	81.3366
3	77.0517	77.6493	77.46		77.8461	78.2656		77.8608	77.5		77.01	77.98		2	78.9769	81.3416		78.793	81.0106		78.3457	80.0345
4	76.9305	77.3003	76.9078		77.1535	80.6696		78.6137	79.21		76.87	76.83		3	78.651	80.6836		78.4145	80.3759		79.4508	85.9609
5	76.4953	76.7317	77.4409		78.0642	78.4449		76.5249	78.1084		77.44	77.9		4	79.7123	80.2765		78.7675	80.125		79.1271	81.0652
6	76.8033	77.4325	77.3988					77.641	76.9101					5	80.3555	80.4504		78.3767	80.7442		78.9136	80.3431
7	77.0152	76.8219	77.3006											6	78.9836	79.494		80.437	81.3508		78.2677	80.0669
8	76.0202	78.1219	77.2394											7	78.9883	81.0576		77.8252	78.8563		79.0151	80.2797
														8	77.7974	79.9567		80.2492	81.0683		84.854	82.1129
														9	77.8723	80.0377		78.1754	79.6632		79.8348	82.1513
														10	78.9533	82.2155		79.131	81.4043		81.9301	80.6772
														11	77.9904	80.1945		79.8465	80.7922		79.7538	82.4229
														12	79.3809	80.4478		78.1572	80.0957		85.0309	83.6319
														13	78.3798	80.5253		77.7719	80.3977		76.7749	78.2309
														14	78.7223	79.3277		77.318	76.9313		79.4885	81.2564
														15	78.0124	78.2854		78.6051	78.7848		80.7246	86.4293
														16		79.0786		77.452	79.5187
R192Q		Figure 4B
	naive				sham wt						sham hom				CCT wt						CCI hom
Animal	wt		hom		left	right					left	right		Animal	left	right					left	right
1	77.0035		78.4589		76.4927	77.2094					76.5612	76.087		1	80.2387	78.93					80.0403	83.3814
2	76.8225		76.1121		77.2362	76.8891					79.9835	77.2122		2	78.0187	80.0826					79.2897	81.3625
3	76.9162		77.9185		77.54	77.6					76.9101	77.463		3	78.5156	79.2141					78.3826	80.1908
4	76.8891		77.2362		76.81	76.78					78.639	77.72		4	78.1942	80.4807					78.8287	80.4509
5					76.244	76.77					76.997	76.12		5	78.0107	80.2878					81.0022	81.7941
														6	78.3388	80.7859					78.6791	79.8245
														7	77.5645	79.2665
														8	78.9282	78.94
														9	77.9535	79.5735

## Sheet: ICP - Fig. 4C
	Figure 4C
	S218L	Animal	wt	het	hom		R192Q	Animal	wt		hom
		1	17.939	20.76	21.2463			1	27.355		23.2643
		2	17.145	17.025	18.4275			2	26.6527		31.485
		3	17.2881	17.5327	21.9589			3	17.3541		20.51
		4	17.6082	17.6082	21.1808			4	20.78		25.875
		5	19.0273	30.6827	34.5233			5	19.66		20.205
		6	23.6357	22.3558	30.1809			6	15.41		29.705
		7	17.5555	15.2458	23.2285			7	18.19		34.08
		8	14.87	13.9546
		9	17.55	15.9379
		10	16.5006	15.0331
		11	18.4653	20.3732
		12	19.1781	22.4065
		13	22.7717	12.5745
		14	22.5713	15.3687
		15	16.6711	15.0331
