# Supplementary material for: CaV2.1 channel mutations causing familial hemiplegic migraine type 1 increase the susceptibility for cortical spreading depolarizations and seizures and worsen outcome after experimental traumatic brain injury
Source: eLife. 2022 Mar 3;11:e74923. doi: 10.7554/eLife.74923 (PMC8920504; doi:10.7554/eLife.74923)
Supplement: Figure 5—source data 1. [file elife-74923-fig5-data1.xlsx]

## Sheet: Contusion volume - Fig. 5A
	Figure 5A
	S218L	Animal	wt	het	hom		R192Q	Animal	wt	hom
		1	26.01	18.06	25.025			1	18.32	15.9725
		2	16.985	19.02	22.865			2	24.27	34.9125
		3	20.39	20.62	23			3	14.4375	15.9025
		4	21.58	13.845	19.475			4	16.2175	22.62
		5	16.945	15.64	31.99			5	27.67	19.96
		6	18.94	21.32	18.465			6	12.965	25.475
		7	13.4	21.5	13.95			7	24.94	25.5
		8	16.815	21.575	21.255			8	25.45	21.115
		9	22.115	18.895	10.96			9	21.079	21.075
		10	13.155	17.465	25.975
		11	15.965	12.7	26.76
		12	23.07	9.395	24.93
		13	15.11	21.31	31.2425
		14	21.635	18.965
		15	19.0675	13.95
		16	20.1975	21.255
		17		10.96
		18		27.2775
		19		24.405
		20		18.9575
		21		20.8425

## Sheet: NSS - Fig. 5B
	Figure 5B
	S218L	Animal	wt	het	hom		R192Q	Animal	wt	hom
		1	1	11.5	10.5			1	5	1
		2	2	8.5	8.5			2	13	15.5
		3	4	2.5	10.5			3	3.5	0.5
		4	5.5	4.5	6			4	12.5	3.5
		5	5	4.5	7			5	5.5	5.5
		6	3	2.5	6			6	4	1
		7	6.5	2	4			7	2	1.5
		8	1.5	3	3.5			8	3	17
		9	1	5	8.5			9	2	1
		10	3	3	5.5			10	2.5
		11	4	2
		12	5	1
		13	2	8
		14	3	5
		15	2	7
		16	1	4
		17	4	7.5
		18	4	2.5
		19	4	2.5
		20	1.5	1.5
		21	2.5	1
		22	10	1
		23	2.5	4

## Sheet: weight loss % - Fig. 5C
	Figure 5C
S218L	Animal	wt	het	hom		R192Q	Animal	wt	hom
	1	17.7606	-19.8953	-4.4693			1	-2.4823	-5.5814
	2	-4.0609	-12.8205	-18.0233			2	-14.9038	-3.937
	3	0	-17.7994	-5.8824			3	-3.7915	1.0695
	4	-4.6729	-5.4455	-21.4592			4	1.2987	-3.5874
	5	-4.6948	2.008	-13.6126			5	-0.4878	-1.6667
	6	0.5291	-6.0773	-18.4713			6	2.8037	-7.377
	7	-4.6083	-7.3298	-10.2679			7	0.361	-2.1622
	8	-1.9512	-3.7559	-6.5			8	-1.0791	-19.3069
	9	0	-3.0075	0.4608			9	-2.439	-0.9901
	10	-2.0305	-4.9242				10	-2.6415	-10.3093
	11	-0.3968	-7.6023				11	-3.9216	-12.6984
	12	-1.0204	-3.629				12	-1.3333	-6.7039
	13	-4.1284	-6.3291				13	0.8811	-3.7433
	14	-0.3846	-2.5547				14	-1.3216	-0.5435
	15	-1.9084	-4.0268				15	-5.9574
	16	-3.1818	-10.6122				16	-2.4
	17	-0.8929	6.4				17	5
	18	2.0619	-4.1284				18	-2.8571
	19	-1.5152	-4.1009
	20	-1.3514	-5.6848
	21	0.5128	-3.9474
	22		-2.6906
